# Supplementary material for: Patellar Resurfacing as a Prognostic Factor in Total Knee Arthroplasty: 20-Year Cohort Study
Source: Research Square preprint supplement (doi:10.21203/rs.3.rs-6798646/v1), 2025-06-17

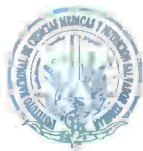

INSTITUTO NACIONAL DE  
CIENCIAS MÉDICAS  
Y NUTRICIÓN  
SALVADOR ZUBIRÁN

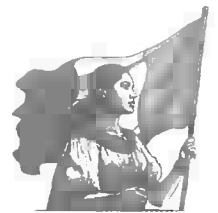

CIUDAD DE MÉXICO, A 19 DE NOVIEMBRE DE 2024  
REG. CONBIOÉTICA-09-CEI-011-20160627  
OFICIO No. MCONTROL-2459/2024

DR. EFRAÍN DÍAZ BORJÓN  
INVESTIGADOR PRINCIPAL  
DIRECCIÓN DE CIRUGÍA  
INSTITUTO NACIONAL DE CIENCIAS MÉDICAS Y NUTRICIÓN SALVADOR ZUBIRÁN  
AV. VASCO DE QUIROGA NO. 15  
COL. BELISARIO DOMÍNGUEZ SECCIÓN XVI  
CIUDAD DE MÉXICO, C.P. 14080  
PRESENTE

En respuesta a su oficio del pasado día 23 de septiembre, con relación al Protocolo de Investigación Clínica, titulado:

**"ARTROPLASTIA TOTAL DE RODILLA CON Y SIN COMPONENTE ROTULIANO.  
RESULTADOS, SOBREVIDA Y COMPLICACIONES  
REF. 3320**

Le informamos que se **toma conocimiento** del estado actual del estudio, así mismo se **autoriza la re-aprobación anual con vigencia hasta el 19 de noviembre de 2025**

Sin más por el momento, quedamos de usted.

ATENTAMENTE,

  
DR. CARLOS A. HINOJOSA BECERRIL  
PRESIDENTE  
COMITÉ DE INVESTIGACIÓN

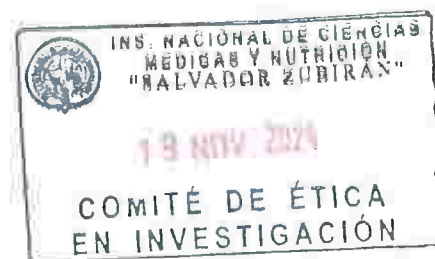

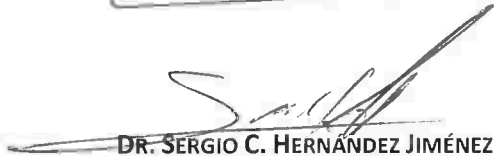  
DR. SERGIO C. HERNÁNDEZ JIMÉNEZ  
PRESIDENTE  
COMITÉ DE ÉTICA EN INVESTIGACIÓN

CAHB/SCHJ/MARV

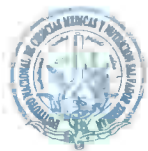

INSTITUTO NACIONAL DE  
CIENCIAS MÉDICAS  
Y NUTRICIÓN  
SALVADOR ZUBIRÁN

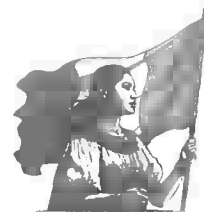

CIUDAD DE MÉXICO, A 19 DE NOVIEMBRE DE 2024  
REG. CONBIOÉTICA-09-CEI-011-20160627  
OFICIO No. MCONTROL-2462/2024

DR. EFRAÍN DÍAZ BORJÓN  
INVESTIGADOR PRINCIPAL  
DIRECCIÓN DE CIRUGÍA  
INSTITUTO NACIONAL DE CIENCIAS MÉDICAS Y NUTRICIÓN SALVADOR ZUBIRÁN  
AV. VASCO DE QUIROGA NO. 15  
COL. BELISARIO DOMÍNGUEZ SECCIÓN XVI  
CIUDAD DE MÉXICO, C.P. 14080  
P R E S E N T E

En respuesta a su oficio del pasado día 23 de septiembre, con relación al Protocolo de Investigación Clínica, titulado:

**"RESULTADOS Y COMPLICACIONES DE ARTROPLASTIA TOTAL DE RODILLA EN DEFORMIDAD ANGULAR SEVERA GENU VARO Y GENU VALGO MAYOR DE 15 ° (20 AÑOS HACIA ATRÁS)"**  
REF. 4227

Le informamos que se **toma conocimiento** del estado actual del estudio, así mismo se **autoriza la re-aprobación anual con vigencia hasta el 19 de noviembre de 2025**

Sin más por el momento, quedamos de usted.

ATENTAMENTE,

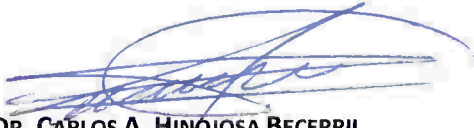  
DR. CARLOS A. HINOJOSA BECERRIL  
PRESIDENTE  
COMITÉ DE INVESTIGACIÓN

  
DR. SERGIO C. HERNÁNDEZ JIMÉNEZ  
PRESIDENTE  
COMITÉ DE ÉTICA EN INVESTIGACIÓN

CAHB/SCHJ/MARV

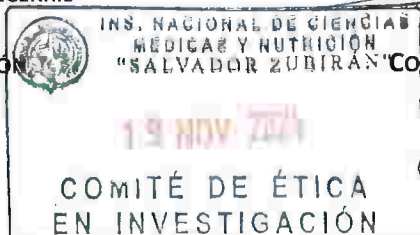

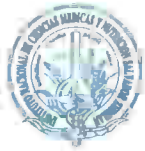

INSTITUTO NACIONAL DE  
CIENCIAS MÉDICAS  
Y NUTRICIÓN  
SALVADOR ZUBIRÁN

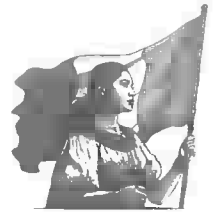

CIUDAD DE MÉXICO, A 19 DE NOVIEMBRE DE 2024  
REG. CONBIOÉTICA-09-CEI-011-20160627  
OFICIO No. MCONTROL-2460/2024

DR. EFRAÍN DÍAZ BORJÓN  
INVESTIGADOR PRINCIPAL  
DIRECCIÓN DE CIRUGÍA  
INSTITUTO NACIONAL DE CIENCIAS MÉDICAS Y NUTRICIÓN SALVADOR ZUBIRÁN  
AV. VASCO DE QUIROGA NO. 15  
COL. BELISARIO DOMÍNGUEZ SECCIÓN XVI  
CIUDAD DE MÉXICO, C.P. 14080  
PRESENTE

En respuesta a su oficio del pasado día 23 de septiembre, con relación al Protocolo de Investigación Clínica, titulado:

**"EXPERIENCIA 25 AÑOS EN PROTRUSIO ACETABULI:  
DEFINICIÓN, MANEJO ACTUAL, RESULTADOS Y COMPLIACIONES"**  
REF. 4228

Le informamos que se **toma conocimiento** del estado actual del estudio, así mismo se **autoriza la re-aprobación anual con vigencia hasta el 19 de noviembre de 2025**

Sin más por el momento, quedamos de usted.

ATENTAMENTE,

DR. CARLOS A. HINOJOSA BECERRIL  
PRESIDENTE  
COMITÉ DE INVESTIGACIÓN

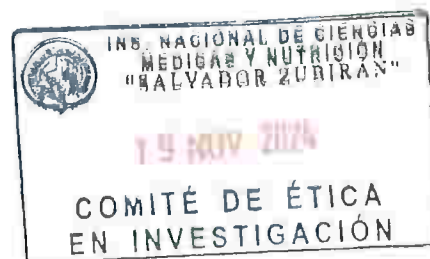

DR. SERGIO C. HERNÁNDEZ JIMÉNEZ  
PRESIDENTE  
COMITÉ DE ÉTICA EN INVESTIGACIÓN

CAHB/SCHJ/MARV

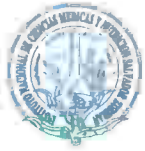

INSTITUTO NACIONAL DE  
CIENCIAS MÉDICAS  
Y NUTRICIÓN  
SALVADOR ZUBIRÁN

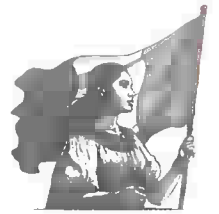

CIUDAD DE MÉXICO, A 19 DE NOVIEMBRE DE 2024  
REG. CONBIOÉTICA-09-CEI-011-20160627  
OFICIO No. MCONTROL-2461/2024

DR. EFRAÍN DÍAZ BORJÓN  
INVESTIGADOR PRINCIPAL  
DIRECCIÓN DE CIRUGÍA  
INSTITUTO NACIONAL DE CIENCIAS MÉDICAS Y NUTRICIÓN SALVADOR ZUBIRÁN  
AV. VASCO DE QUIROGA NO. 15  
COL. BELISARIO DOMÍNGUEZ SECCIÓN XVI  
CIUDAD DE MÉXICO, C.P. 14080  
PRESENTE

En respuesta a su oficio del pasado día 23 de septiembre, con relación al Protocolo de Investigación Clínica, titulado:

**"ARTROPLASTÍA TOTAL DE CADERA EN ENFERMEDADES REUMATOLÓGICAS. SOBREVIDA Y RESULTADOS. ARTROPLASTÍA CEMENTADA VS NO CEMENTADA (30 AÑOS DE SEGUIMIENTO)"**  
REF. 4231

Le informamos que se **toma conocimiento** del estado actual del estudio, así mismo se **autoriza la re-aprobación anual con vigencia hasta el 19 de noviembre de 2025**

Sin más por el momento, quedamos de usted.

ATENTAMENTE,

DR. CARLOS A. HINOJOSA BECERRIL  
PRESIDENTE  
COMITÉ DE INVESTIGACIÓN

DR. SERGIO C. HERNÁNDEZ JIMÉNEZ  
PRESIDENTE  
COMITÉ DE ÉTICA EN INVESTIGACIÓN

CAHB/SCHJ/MARV

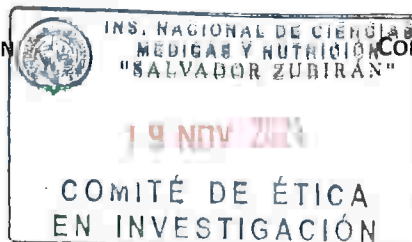

Supplement: Supplementary file 1 [file d5d68f83df79bc6bb43054d3.pdf]
