# Supplementary material for: Patellar Resurfacing as a Prognostic Factor in Total Knee Arthroplasty: 20-Year Cohort Study
Source: Research Square preprint supplement (doi:10.21203/rs.3.rs-6798646/v1), 2025-06-17
Supplement: Supplementary file 1 [file 1de8a79271dd4164ca97c1f0.xlsx]

## Sheet: Table 4. Comparison of function
Table 4. Comparison of functionality and pain related to resurfacing in TKA
Evaluation scale	Study phase	PR group	WPR group	P-value
		Range of scores per scale
WOMAC	Preoperative	22 - 94	22 - 89	0.01
	Postoperative	0 - 70	0 - 70	<0.001
OKS	Preoperative	1934-02-01	2029-02-01	0.86
	Postoperative	14 - 48	1948-10-01	<0.001
NRS	Preoperative	2025-08-04	2025-10-03	0.69
	Postoperative	0 - 6	0 - 6	<0.001
This is a report of the range of scores of the WOMAC and OKS
functional scales, as well as a pain assessment. The P value was
estimated using the student's t-test.
