# Supplementary material for: Patellar Resurfacing as a Prognostic Factor in Total Knee Arthroplasty: 20-Year Cohort Study
Source: Research Square preprint supplement (doi:10.21203/rs.3.rs-6798646/v1), 2025-06-17
Supplement: Supplementary file 2 [file 21c7021b6e5df706611bd7b1.xlsx]

## Sheet: Table 3. Complications related 
Table 3. Complications related to resurfacing techniques in TKA
Complications	PR group	WPR group	P-value
Aseptic loosening	4.4	12	0.01
Periprosthetic join infection	5	5	0.91
Arthrofibrosis	4	8	0.24
Posterior instability	0	1	0.3
Medial instability	0	2	0.14
Patellar tendinitis	0	1	0.3
Periprosthetic fracture	2	2	0.66
Peroneal nerve injury	2	2	0.95
Anterior knee pain	2.2	85.2	<0.001
Revision surgery	5.1	6.7	0.54
Percentage frequency of complications. The p-value was
estimated using a test for differences between z-proportions.
