# Supplementary material for: Patellar Resurfacing as a Prognostic Factor in Total Knee Arthroplasty: 20-Year Cohort Study
Source: Research Square preprint supplement (doi:10.21203/rs.3.rs-6798646/v1), 2025-06-17
Supplement: Supplementary file 3 [file 230898f4dbe13e46d600febd.xlsx]

## Sheet: Table 2. Comorbidities of patie
Table 2. Comorbidities of patients who underwent TKA over 20 years.
Comorbidities	PR group	WPR group	P-value
Number of patients	136	135
Rheumatoid arthritis	93	102	0.19
Systemic lupus erythematosus	24	13	0.36
Ankylosing spondylitis	2	2	-
The frequency among the total number of cases was 271 patients
. The p-value was determined using a Student's t-test.
