# Supplementary material for: Patellar Resurfacing as a Prognostic Factor in Total Knee Arthroplasty: 20-Year Cohort Study
Source: Research Square preprint supplement (doi:10.21203/rs.3.rs-6798646/v1), 2025-06-17
Supplement: Supplementary file 4 [file 24097868f47c4f70dd5c5ee4.xlsx]

## Sheet: Table 1. Distribution of age gr
Table 1. Distribution of age groups of patients who underwent TKA.
Age groups	Gender		Total (%)
	Female (%)	Male (%)
20 - 29 years	2	0	1
30 - 39 years	5	2	4
40 - 49 years	14	13	14
50 - 59 years	20	24	21
> 60 years	59	62	59
The distribution frequency percentage is presented
by age group and gender.
