# Supplementary material for: Patellar Resurfacing as a Prognostic Factor in Total Knee Arthroplasty: 20-Year Cohort Study
Source: Research Square preprint supplement (doi:10.21203/rs.3.rs-6798646/v1), 2025-06-17
Supplement: Supplementary file 5 [file 4b1bc97d85d41f0ec15d8c3b.xlsx]

## Sheet: Table 6. Cox regression model r
Table 6. Cox regression model related to resurfacing in TKA
Variable	HR	CI 95%	P-value
WPR VS PR	2.33	0.01 – 500	0.76
Anterior knee pain	1.15	0.005 – 250	0.96
Aseptic loosening	16.7	4.35 – 50.0	<0.001
The PR group was used as the reference in the Cox
regression analysis. The P-value was calculated using
the Wald test
