# Supplementary material for: Patellar Resurfacing as a Prognostic Factor in Total Knee Arthroplasty: 20-Year Cohort Study
Source: Research Square preprint supplement (doi:10.21203/rs.3.rs-6798646/v1), 2025-06-17
Supplement: Supplementary file 6 [file c34ecefbe1aea5237023b6c1.xlsx]

## Sheet: Table 5. Association between PR
Table 5. Association between PR and primary outcomes after TKA
Main outcomes	PR (n=136)	WPR (n=135)	OR (95 % CI)	RR (95 % CI)
Aseptic loosening	6 (4.4 %)	16 (11.9 %)	2.91 (1.10 – 7.69)	2.69 (1.08 – 6.66)
Anterior knee pain	3 (2.2 %)	115 (85.2 %)	254.9 (73.9 – 879.9)	38.6 (12.6 – 118.5)
Revision surgery	7 (5.1 %)	9 (6.7 %)	1.32 (0.48 – 3.64)	1.30 (0.50 – 3.38)
The P value of OR was determined by using Wald test, and the P value
was determined by using Pearson's χ² test.
